# Supplementary material
Source: Research Square preprint supplement (doi:10.21203/rs.3.rs-9445054/v1)
Supplement: Supplementary file 1 [file 260d20bd5d7eec8b8b93bed1.pdf]

## 1 Appendix A Models Used

2 Table A1 lists all models used in the experiments, while supplementary Table A2 lists  
 3 all encoder models used in the SpanMarker setup experiments, including additional  
 4 pretraining data information and classification according to the underlying model  
 5 architecture (RoBERTa, BERT, or DistilRoBERTa).

| Model                                                    | Year  | Version or ID                            |
|----------------------------------------------------------|-------|------------------------------------------|
| RoBERTa (Liu et al. 2019)                                | 2019  | FacebookAI/roberta-base                  |
| INDUS (Bhattacharjee et al. 2024)                        | 2024  | nasa-impact/nasa-smd-ibm-v0.1            |
| INDUS <sub>SDE</sub> (Bhattacharjee et al. 2024)         | 2024  | nasa-impact/indus-sde-v0.2               |
| BERT (Devlin et al. 2019)                                | 2019  | google-bert/bert-base-uncased            |
| SciBERT (Beltagy et al. 2019)                            | 2019  | allenai/scibert_scivocab_uncased         |
| CliSciBERT (Poleksić and Martinčić-Ipšić 2025)           | 2025  | POL3/cliscibert_scivocab_uncased         |
| CliReBERT (Poleksić and Martinčić-Ipšić 2025)            | 2025  | POL3/clirebert_clirevocab_uncased        |
| DistilRoBERTa (Sanh et al. 2020)                         | 2020  | distilbert/distilroberta-base            |
| EnvironmentalBERT (Schimanski et al. 2024)               | 2024  | ESGBERT/EnvironmentalBERT-base           |
| ClimateBERT (Webersinke et al. 2022)                     | 2022  | climatebert/distilroberta-base-climate-f |
| SciClimateBERT (Poleksić and Martinčić-Ipšić 2025)       | 2025  | POL3/sciclimatebert                      |
| GLiNER <sub>SMALL v2.5</sub> (Zaratiana et al. 2024)     | 2024  | gliner-community/gliner_small-v2.5       |
| GLiNER <sub>MEDIUM v2.5</sub> (Zaratiana et al. 2024)    | 2024  | gliner-community/gliner_medium-v2.5      |
| GPT-5.1 (OpenAI 2025a)                                   | 2025a | gpt-5.1-2025-11-13                       |
| GPT-5.2 <sub>PRO</sub> (OpenAI 2025b)                    | 2025b | gpt-5.2-pro-2025-12-11                   |
| Gemini 2.5 <sub>PRO</sub> (Comanici et al. 2025)         | 2025  | 2.5                                      |
| Gemini 3.0 <sub>PRO</sub> (Google 2025)                  | 2025  | 3-pro-preview-11-2025                    |
| DeepSeek-V3.2 <sub>NT</sub> (DeepSeek-AI et al. 2025)    | 2025  | DeepSeek-V3.2                            |
| DeepSeek-V3.2 <sub>THINK</sub> (DeepSeek-AI et al. 2025) | 2025  | DeepSeek-V3.2                            |
| Claude 4.5 <sub>SONNET</sub> (Anthropic 2025b)           | 2025b | claude-sonnet-4-20250514                 |
| Claude 4.5 <sub>OPUS</sub> (Anthropic 2025a)             | 2025a | claude-opus-4-20250514                   |

**Table A1: Models used in experiments:** List of all models used in experiments, including the year of publication and their specific versions or Hugging Face IDs for open-source models.

## 6 Appendix B Entity Type Definitions

7 Traditionally, NER aims to assign predefined entity types, such as location, organiza-  
 8 tion, and person, to text spans. However, such coarse-grained types are often insufficient  
 9 to capture the domain-specific nuances required in specialised domains such as climate  
 10 change research (Anonymous 2026). In this work, we start with 21 NER types initially  
 11 defined in (Anonymous 2026), and expand them to 28 types. Specifically, the initial 21  
 12 types defined are: *Astronomical Object*, *Body of Water*, *Chemical*, *Disease*, *Ecosys-*  
 13 *tem*, *Energy Source*, *Field of Study*, *Geographical Feature*, *Location*, *Mathematical*  
 14 *Expression*, *Measurement Unit*, *Measuring Device*, *Meteorological Phenomenon*, *Nat-*  
 15 *ural Disaster*, *Natural Phenomenon*, *Organization*, *Physical Phenomenon*, *Quantity*,  
 16 *Satellite*, *System*, and *Time Period*.

17 During the initial phase of this research, we iteratively discuss and edit the entity  
 18 types based on quantitative feedback from the initial annotation. Specifically, across

| Model                                              | Year | Data                                                                 | Domain                                                                       |
|----------------------------------------------------|------|----------------------------------------------------------------------|------------------------------------------------------------------------------|
| <b>RoBERTa</b>                                     |      |                                                                      |                                                                              |
| RoBERTa (Liu et al. 2019)                          | 2019 | BookCorpus, Wikipedia, CC-News, OpenWeb-Text, CommonCrawl (Stories)  | General                                                                      |
| INDUS (Bhattacharjee et al. 2024)                  | 2024 | ADS, PubMed Central, PubMed Abstracts, Wikipedia, AMS/AGU, NASA CMR  | Scientific / Earth Science / Biomedical / Astronomy / Astrophysics / Physics |
| INDUS <sub>SDE</sub> (Bhattacharjee et al. 2024)   | 2024 | INDUS + SDE Data                                                     | Scientific                                                                   |
| <b>BERT</b>                                        |      |                                                                      |                                                                              |
| BERT (Devlin et al. 2019)                          | 2019 | BookCorpus, Wikipedia                                                | General                                                                      |
| SciBERT (Beltagy et al. 2019)                      | 2019 | Biomedical Papers (Full-text), Computer Science Papers (Full-text)   | Scientific / Biomedical / Computer Science                                   |
| ChiSciBERT (Poleksić and Martinčić-Ipšić 2025)     | 2025 | SciBERT + Climate Papers (Full-text)                                 | Scientific / Biomedical / Computer Science / Climate Science                 |
| ChiReBERT (Poleksić and Martinčić-Ipšić 2025)      | 2025 | Climate Papers (Full-text)                                           | Scientific / Climate Science                                                 |
| <b>DistilRoBERTa</b>                               |      |                                                                      |                                                                              |
| DistilRoBERTa (Sanh et al. 2020)                   | 2020 | RoBERTa                                                              | General                                                                      |
| EnvironmentalBERT (Schimanski et al. 2024)         | 2024 | DistilRoBERTa + Corporate News, Annual, and Sustainability Reports   | Environmental / ESG                                                          |
| ClimateBERT (Webersinke et al. 2022)               | 2022 | DistilRoBERTa + Climate News, Climate Papers (Abstracts) and Reports | Scientific / Climate / ESG                                                   |
| SciClimateBERT (Poleksić and Martinčić-Ipšić 2025) | 2025 | ClimateBERT + Climate Papers (Full-text)                             | Scientific / Climate Science                                                 |

**Table A2: Overview of pretrained models:** Summary of all encoder based models used in the (SpanMarker) experiments, grouped by backbone architecture. The table lists the publication year, pretraining data sources, and the target domain.

19 the arbitrary set of sentences, we examine the frequency of occurrence of each entity  
20 type. For types with critically low frequency, including those with zero occurrences, we  
21 curated sets of regular expression search terms to identify sentences likely to contain  
22 the respective entities. For example, for the *Astronomical Object* type, we search  
23 for sentences containing terms such as *planet*, *moon*, *star*, and *sun*. If even targeted  
24 searches for sentences to annotate do not yield useful results, i.e. enough examples of  
25 an entity type with sufficient diversity, we merge or discard the entity type entirely, as  
26 is the case for *Astronomical Object*, which we merge with *Location*.

27 Conversely, we iteratively inspected the *Other* type, used as a default label for  
28 entities without a suitable type. We identified clusters of instances, performed manual  
29 inspection which introduced new types, including *Body Part*, *Intellectual Artefact*,  
30 *Person*, *Organism*, and *Asset* (borrowed from Bhattacharjee et al. (2024)), inter alia.  
31 Table B3 presents the final set of 28 NER types together with their definitions.

| Type                      | Definition                                                                                                                                                                                                                                                                                                                     |
|---------------------------|--------------------------------------------------------------------------------------------------------------------------------------------------------------------------------------------------------------------------------------------------------------------------------------------------------------------------------|
| Asset                     | An <b>Asset</b> is an object or service of value to humans that can get destroyed or diminished by climate disasters/hazards. Key categories are health, buildings, infrastructure, and crops or livestock.                                                                                                                    |
| Body of Water             | A <b>Body of Water</b> is a distinct volume or mass of water, whether naturally occurring (like an ocean or river) or contained within a man-made system (like a reservoir or effluent flow). This includes specific named bodies, general types, and scientifically defined water masses.                                     |
| Body Part                 | A <b>Body Part</b> is a structural component of a living organism (plant, animal, or human), which is not the whole organism but a distinct anatomical or morphological part.                                                                                                                                                  |
| Chemical                  | A <b>Chemical</b> is a substance with a distinct molecular composition, including elements, compounds, ions, biological molecules, and mixtures. It also encompasses classes of substances, reagents, and terms describing their chemical state or form.                                                                       |
| Disease                   | A <b>Disease</b> is an abnormal condition, disorder, or pathological state affecting an organism. This includes specific diseases, syndromes, symptoms, signs, injuries, toxicities, and observed pathological changes.                                                                                                        |
| Ecosystem                 | An <b>Ecosystem</b> is a community of interacting organisms and their physical environment, or a term used to describe such a community. This includes specific named ecosystems, general types of habitats, and collective terms for the biological components that define them.                                              |
| Energy Source             | An <b>Energy Source</b> is a substance, material, natural phenomenon, or engineered system that provides or stores usable energy. This includes fuels, renewable resources, electricity, heat, and energy storage technologies.                                                                                                |
| Field of Study            | A <b>Field of Study</b> is a branch of knowledge, a specific academic or scientific discipline, or a theoretical domain of inquiry.                                                                                                                                                                                            |
| Geographical Feature      | A <b>Geographical Feature</b> is a natural or man-made feature of the Earth's solid surface or subsurface, including landforms, topographical structures, and defined regions of land.                                                                                                                                         |
| Intellectual Artefact     | An <b>Intellectual Artefact</b> is a man-made product, typically of an informational, intellectual, or representational nature, resulting from scientific research, data collection, or modeling.                                                                                                                              |
| Location                  | A <b>Location</b> is a point, area, or region in physical space, defined by natural, administrative, cultural, or geopolitical boundaries or functions. It may occur on Earth or elsewhere in the universe.                                                                                                                    |
| Mathematical Expression   | A <b>Mathematical Expression</b> is a term, symbol, equation, or concept related to mathematics, statistics, or formal modeling. This includes formulas, variables, statistical metrics, mathematical operations, and descriptions of quantitative relationships or trends.                                                    |
| Measuring Device          | A <b>Measuring Device</b> is an instrument, apparatus, technology, or system used to obtain quantitative measurements of a physical, biological, or chemical property.                                                                                                                                                         |
| Meteorological Phenomenon | A <b>Meteorological Phenomenon</b> is a weather- or climate-related event, process, or pattern occurring in the atmosphere and its interaction with the Earth's surface, particularly oceans. This includes specific weather events, large-scale climate oscillations, atmospheric circulation patterns, and long-term trends. |
| Method                    | A <b>Method</b> is a systematic procedure, technique, model, experiment, or approach used to conduct research, perform an analysis, collect data, or achieve a specific practical or scientific outcome.                                                                                                                       |
| Natural Disaster          | A <b>Natural Disaster</b> (or Hazard) is a large-scale adverse event, arising from natural, environmental, or climatic processes, that has the potential to cause significant harm or disruption to ecosystems, the environment, or human well-being.                                                                          |
| Natural Phenomenon        | A <b>Natural Phenomenon</b> is an observable event or process that occurs in the natural world, driven by biological, physical, or chemical principles. It encompasses interactions, cycles, transformations, and large-scale environmental changes.                                                                           |
| Organism                  | An <b>Organism</b> is an individual living being (animal, plant, fungus, microbe) or a term that refers to a species, a taxonomic group, or a collection of individuals.                                                                                                                                                       |
| Organization              | An <b>Organization</b> is a formally constituted group, such as a company, institution, government agency, laboratory, or association, with a specific, collective purpose.                                                                                                                                                    |
| Other                     | A <b>Other</b> is a miscellaneous category for named entities that do not fit into any of the more specific, defined types. It often includes abstract concepts, generic objects, textual references, and descriptive attributes that have been isolated as entities.                                                          |
| Person                    | A <b>Person</b> is an individual or a group of human beings, identified by name, profession, or through a personal pronoun.                                                                                                                                                                                                    |
| Physical Artefact         | A <b>Physical Artefact</b> (or Object) is a tangible, material entity with physical form. This includes both man-made products, such as tools, machines, vehicles, or buildings, and natural objects, such as soil, rocks, leaves, plant samples, powders, or other collected specimens.                                       |
| Physical Phenomenon       | A <b>Physical Phenomenon</b> is an observable event or property that is not a substance, but rather a manifestation of energy, force, temperature, or state. It encompasses a wide range of processes from molecular interactions to large-scale environmental dynamics.                                                       |
| Policy or Objective       | A <b>Policy or Objective</b> is a defined goal, aim, or challenge that guides actions, or a framework of principles and rules to achieve those goals. This class encompasses high-level aims, specific targets, strategic plans, and guiding principles for management and governance.                                         |
| Quantity                  | A <b>Quantity</b> is a measurement, count, property, or value that is quantifiable. This includes numerical values with units, descriptive terms of amount or degree, statistical measures, and abstract quantifiable properties.                                                                                              |
| Satellite                 | A <b>Satellite</b> is a man-made object, spacecraft, or instrument platform placed into orbit around a celestial body, primarily for purposes like remote sensing, data collection, or communication.                                                                                                                          |
| System                    | A <b>System</b> is a set of interacting or interdependent components that form an integrated whole. This includes large-scale natural systems, engineered constructs, and abstract or theoretical frameworks that describe a set of interactions.                                                                              |
| Time Period               | A <b>Time Period</b> is a specific point in time, a duration, or a recurring interval. This includes dates, years, seasons, epochs, and terms describing frequency or temporal extent.                                                                                                                                         |

**Table B3: Entity type definitions: A table with definitions for 28 NE types in CiiReNER datasets.**

## 32 Appendix C Weighted Expert Voting

33 To consolidate individual annotations into a unified ground truth, we use a Weighted  
 34 Expert Voting (WEV) scheme as a transparent aggregation heuristic that explicitly  
 35 encodes domain expertise. Annotators labelling entities within their designated exper-  
 36 tise cluster are assigned a slightly higher weight of  $w_e = 1.1$ , non-expert annotators a  
 37 slightly lower weight of  $w_n = 0.9$ , and the non-entity (O) label a baseline weight of  
 38  $w_{null} = 1.0$ . Note that sentences may be repeated in several expert groups; therefore,  
 39 the original expertise is emphasised. Table C4 lists the six expert groups along with  
 40 the number of sentences assigned to annotators in each group.

41 These weights are not intended to estimate annotator reliability or optimise agree-  
 42 ment with any reference standard. Rather, they serve as weak priors designed to bias  
 43 aggregation decisions conservatively in favour of domain expertise while preserving  
 44 majority influence. Specifically, the relative ordering  $w_e > w_{null} > w_n$  reflects the  
 45 assumption that expert annotations are marginally more informative, while the con-  
 46 straint  $2w_n > w_e$  ensures that no single expert vote can override consistent non-expert  
 47 agreement. To operationalise these weights, we implement a two-stage cumulative  
 48 voting strategy, designed to resolve boundary conflicts (e.g., B-Time Period vs. I-Time  
 49 Period) without penalising semantic agreement. First, votes are aggregated at the  
 50 semantic class level: weights for all BIO tags associated with a specific entity type  
 51 are summed to determine the winning category. This prevents vote splitting, ensuring  
 52 that a valid entity type does not lose due to minor disagreements regarding start/end  
 53 tokens. Once the semantic class is determined, a secondary vote determines the precise  
 54 BIO tag based on the highest weighted support within that type. In the event of exact  
 55 weight ties, the decision is resolved deterministically by selecting the less frequent type  
 56 according to the  $\text{CliReNER}_{silver}$  distribution<sup>1</sup>.

57 To assess whether this explicit expertise-aware aggregation introduces systematic  
 58 artefacts, we compare the resulting labels with those produced by MACE (Hovy et al.  
 59 2013), a standard probabilistic model for multi-annotator annotation. The two methods  
 60 show substantial agreement, achieving a Cohen’s  $\kappa$  of 0.9076 and a raw agreement  
 61 of 93.34%. This level of convergence suggests that incorporating domain expertise  
 62 through a lightweight deterministic rule yields a consensus broadly consistent with

<sup>1</sup>We assume that rarer entity types are less likely to be selected, as identifying them may require greater cognitive effort from annotators. Although this assumption is admittedly imperfect, we consider it the least detrimental for the purposes of aggregation.

| Group | Group Focus                          | Entity Types                                                                       | #  |
|-------|--------------------------------------|------------------------------------------------------------------------------------|----|
| 1     | Research methodology and governance  | Method, Field of Study, Intellectual Artefact, Asset, and Policy or Objective      | 59 |
| 2     | Geospatial and temporal concepts     | Location, Geographical Feature, Body of Water, Time Period, and Satellite          | 60 |
| 3     | Physical sciences and quantification | Mathematical Expression, Measuring Device, Physical Phenomenon, and Quantity       | 55 |
| 4     | Biochemistry, ecology and pathology  | Body Part, Chemical, Disease, Organism, and Ecosystem                              | 59 |
| 5     | Atmospheric science and geophysics   | Energy Source, Meteorological Phenomenon, Natural Disaster, and Natural Phenomenon | 75 |
| 6     | General agents and tangible objects  | Physical Artefact, Organization, Person, and System                                | 67 |

**Table C4: Annotator group expertise and entity assignment:** Classification of the six annotator groups (pairs) by thematic focus, listing the total number of sentences each group annotated (#) and the specific entity types assigned to each pair based on their scientific backgrounds.

63 learned annotator-reliability models. Figure C1 presents per-entity-type Cohen’s  $\kappa$   
 64 values in a histogram. Most types (24/28) show above-substantial agreement (Cohen’s  
 65  $\kappa > 0.80$ ) between MACE and WEV labels. Lower agreement is found for *Meteorological*  
 66 *Phenomenon* (0.75), *Other* (0.68), *Physical Phenomenon* (0.77), and *System* (0.73).  
 67 These disagreements likely result from inherent semantic ambiguity; for example,  
 68 *Meteorological Phenomenon* and *System* may overlap when referring to large-scale  
 69 atmospheric concepts such as *climate*.

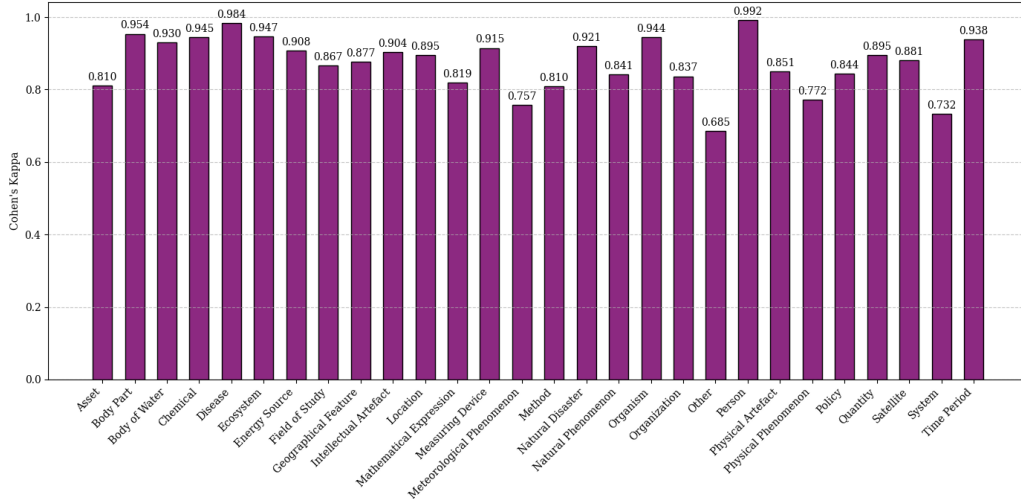

**Fig. C1: Agreement by entity type between MACE and WEV labels:** Distribution of Cohen’s Kappa scores (y-axis) evaluated for each named entity type (x-axis). Bar heights indicate the reliability of annotations for specific entity types, adjusted for risk of chance agreement. Exact Kappa values are shown above each corresponding bar.

70 Given this alignment, we adopt WEV for final dataset construction. Compared  
 71 to probabilistic aggregation, WEV provides a fully deterministic and reproducible  
 72 decision process, with consensus labels directly traceable to annotator expertise.

## 73 Appendix D Hardware and Environmental Impact

74 All fine-tuning experiments were conducted on a single NVIDIA GeForce RTX 4070 Ti  
 75 GPU (CUDA 12.8) and a 13th Gen Intel Core i7-13700F processor. For every run (13  
 76 models  $\times$  5 seeds), we monitored average GPU power ( $\bar{P}$ ) and runtime ( $T$ ) via Weights  
 77 & Biases<sup>2</sup>, deriving energy consumption as  $E = \bar{P} \times T$ . We report metrics averaged  
 78 across seeds, where carbon footprints were quantified ( $\text{CO}_2 = E \times I$ ) based on the  
 79 local grid carbon intensity for Croatia ( $I \approx 243.30 \text{ gCO}_2\text{eq/kWh}$ )<sup>3</sup>. Across the full

<sup>2</sup><https://wandb.ai/site/>

<sup>3</sup><https://lowcarbonpower.org/region/Croatia>

80 experimental suite (65 runs), the cumulative execution time was  $\approx 10.77$  hours. The  
 81 total energy consumption for these experiments amounted to 1.4060 kWh, resulting in  
 82 a net environmental footprint of 342.08 gCO<sub>2</sub>eq (0.3421 kg).

## 83 Appendix E Fine-tuning Parameters

| Parameter                   | Value | Parameter                   | Value  |
|-----------------------------|-------|-----------------------------|--------|
| learning_rate               | 5e-5  | learning_rate               | 5e-6   |
| weight_decay                | 0.01  | others_lr                   | 1e-5   |
| model_max_length            | 512   | others_weight_decay         | 0.01   |
| marker_max_length           | 256   | focal_loss_alpha            | 0.75   |
| entity_max_length           | 14    | focal_loss_gamma            | 2      |
| per_device_train_batch_size | 8     | lr_scheduler_type           | linear |
| gradient_accumulation_steps | 2     | weight_decay                | 0.01   |
| num_train_epochs            | 20    | per_device_train_batch_size | 8      |
| warmup_ratio                | 0.1   | gradient_accumulation_steps | 2      |
| save_total_limit            | 5     | num_train_epochs            | 20     |
| logging_steps               | 50    | warmup_ratio                | 0.1    |
|                             |       | save_total_limit            | 5      |

(a) SpanMarker configuration

(b) GLiNER configuration

**Table E5: Hyperparameter configurations:** Detailed training settings for the two models. Subtable (a) details the SpanMarker setup including architecture constraints, while subtable (b) lists GLiNER with focal loss parameters.

## 84 Appendix F Entity Type Mapping Results

85 Figure F2 provides a detailed overview of entity type alignment between the CliReNER  
 86 schema and the BiodivNER, Climate-Change NER, and ClimateIE schemas. Larger  
 87 dot sizes and lighter colours indicate higher overlap percentages.

88 For Climate-Change NER, the alignment shows a shift from functional categories to  
 89 stricter ontological labelling. Broad thematic types such as *climate-impacts* are divided  
 90 into more specific inherent types (e.g., *Disease* and *Natural Disaster*), while *climate-*  
 91 *observations* is systematically disambiguated into concrete instruments, methods,  
 92 and platforms (e.g., *Measuring Device*, *Satellite*, and *Intellectual Artefact*). Notable  
 93 ontological shifts are seen for ClimateIE. The type *project* maps primarily to *Intellectual*  
 94 *Artefact* (68.6%), while *experiment* aligns strongly with *Policy or Objective* (82.3%).

95 More broadly, CliReNER enforces a clear separation between physical entities and  
 96 conceptual processes (e.g., ClimateIE’s *instrument* is divided into *Measuring Device*  
 97 and *Method*). Persistent low-frequency mappings to *Other*, particularly in Climate-  
 98 Change NER, likely reflect residual annotation noise or genuine out-of-ontology edge

99 cases. To facilitate future domain-specific NER research, all harmonised datasets are  
100 publicly released on Hugging Face<sup>4</sup>.

---

<sup>4</sup>Mapped BiodivNER: [https://www.anonymised\\_url4review.org](https://www.anonymised_url4review.org);  
Climate-Change NER: [https://www.anonymised\\_url4review.org](https://www.anonymised_url4review.org);  
ClimateIE: [https://www.anonymised\\_url4review.org](https://www.anonymised_url4review.org).

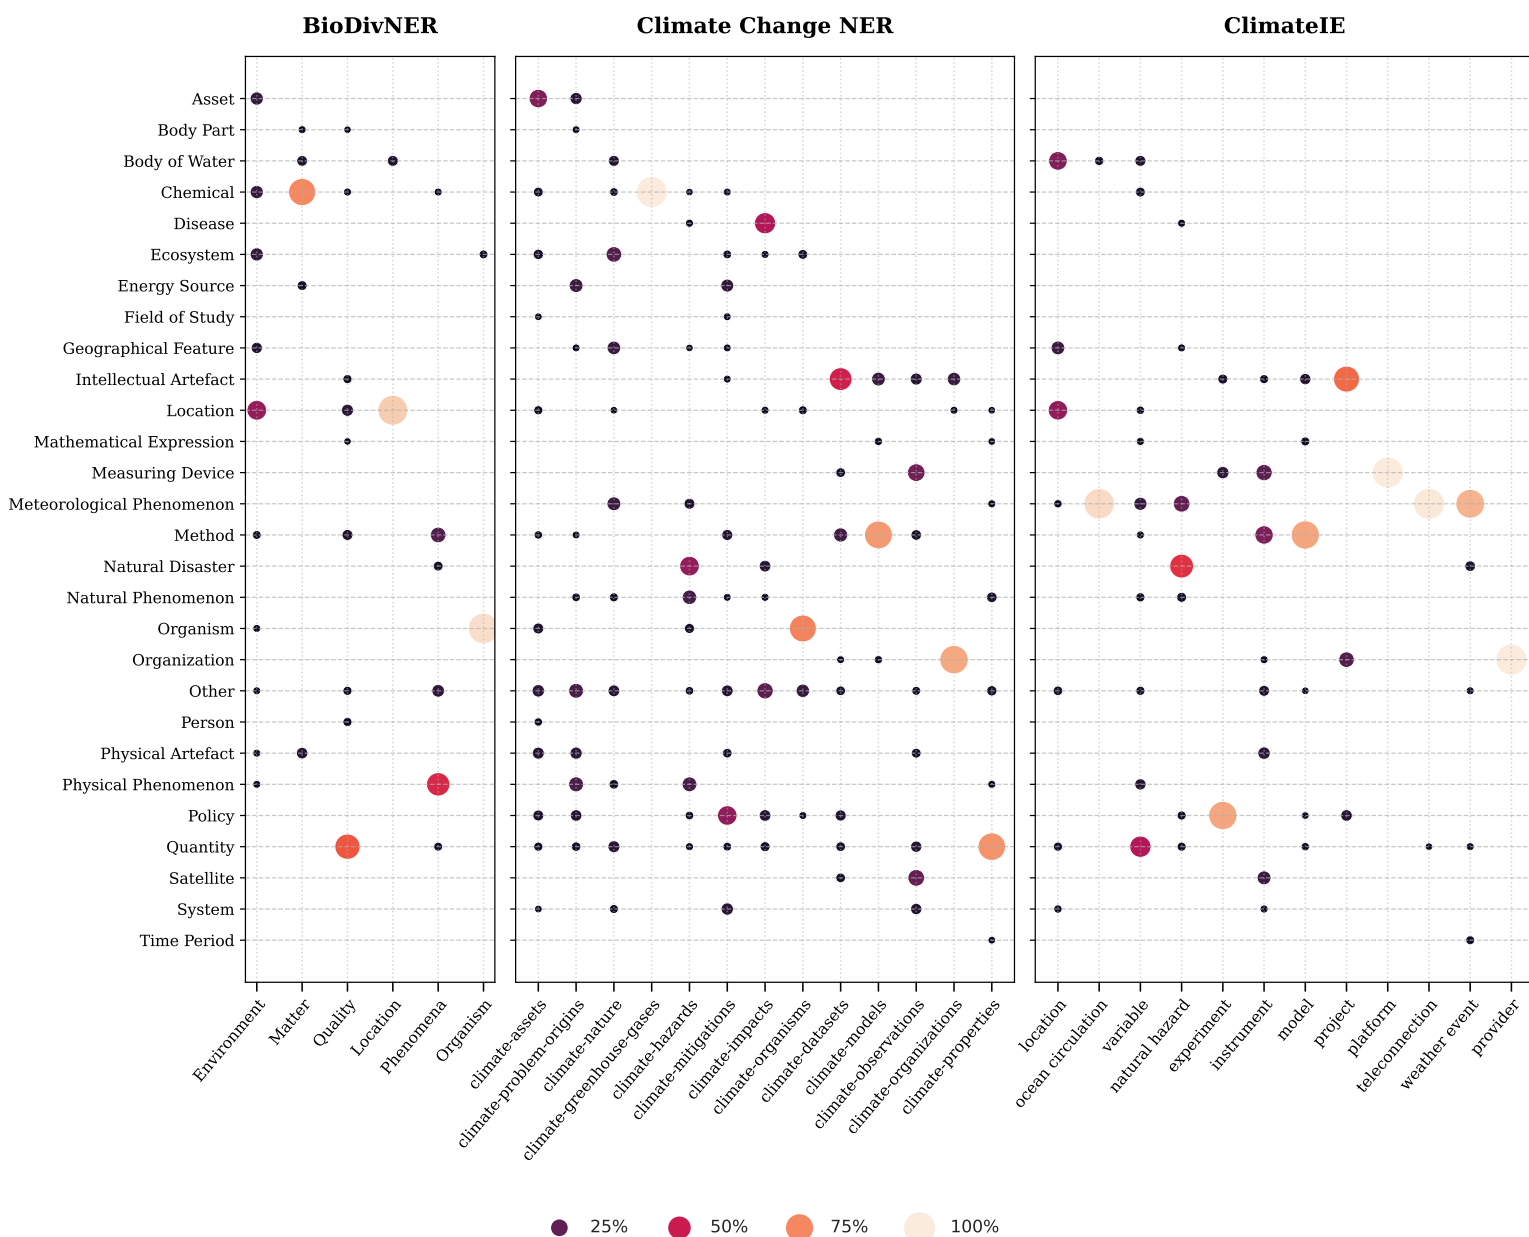

**Fig. F2: Entity alignment and distribution:** Visual mapping of original entity labels (x-axis) from BiodivNER, Climate-Change NER, and ClimateIE to the target CliReNER schema (y-axis). Dot size and color intensity represent the correspondence percentage. Mappings occurring with a frequency below 1% are omitted for clarity.

101 **Appendix G Results Supplement**

102 This section provides supplementary visualizations of model evaluation and domain  
 103 adaptation effects. Figure G3 illustrates the relationship between lexical diversity,  
 104 measured by the Unique Entity Ratio (UER), and overall *strict* F1 scores, highlighting  
 105 performance decay as entity diversity increases on the CliReNER<sub>gold</sub> dataset.

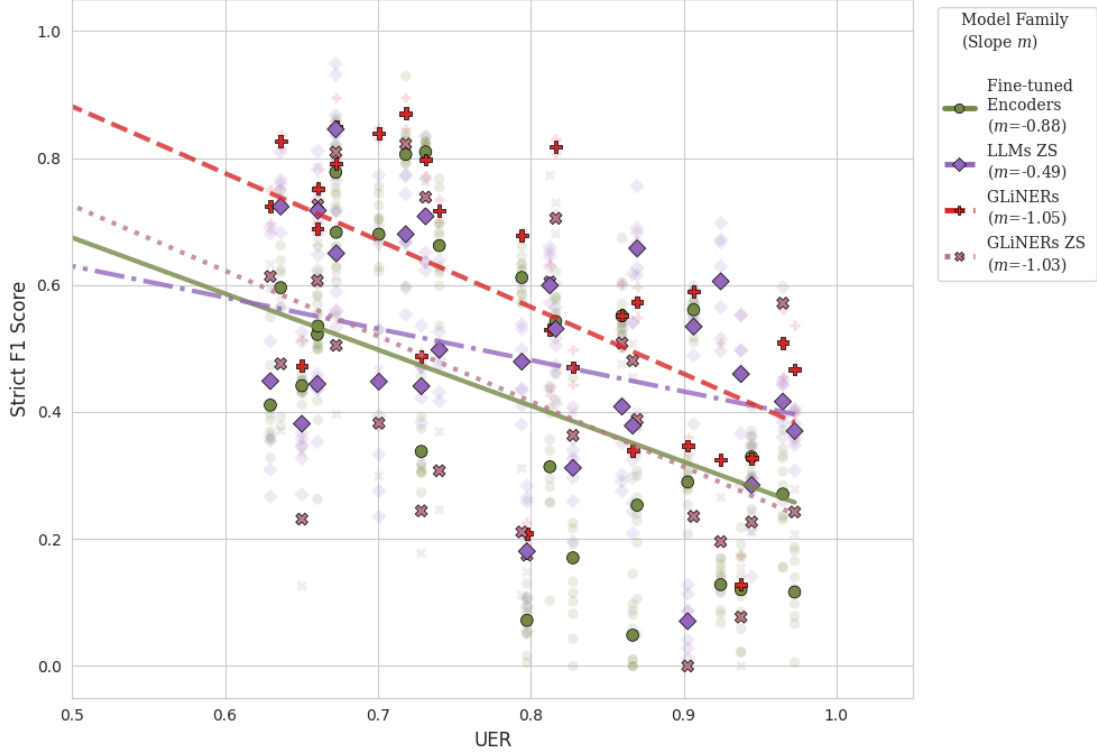

**Fig. G3: Lexical diversity vs. performance:** Impact of Unique Entity Ratio (UER) on model F1 scores. Regression slopes ( $m$ ) quantify the performance decay as entity diversity increases. Solid markers denote family-level means on the CliReNER<sub>gold</sub> dataset, while transparent points indicate variance across individual models.

106 Figures G4 and G5 further present a fine-grained, entity-level analysis of domain  
 107 adaptation gains, showing changes in *strict* F1 scores between domain-adapted models  
 108 (INDUS, CliSciBERT) and their respective baselines (RoBERTa, SciBERT), with  
 109 statistically significant differences explicitly indicated.

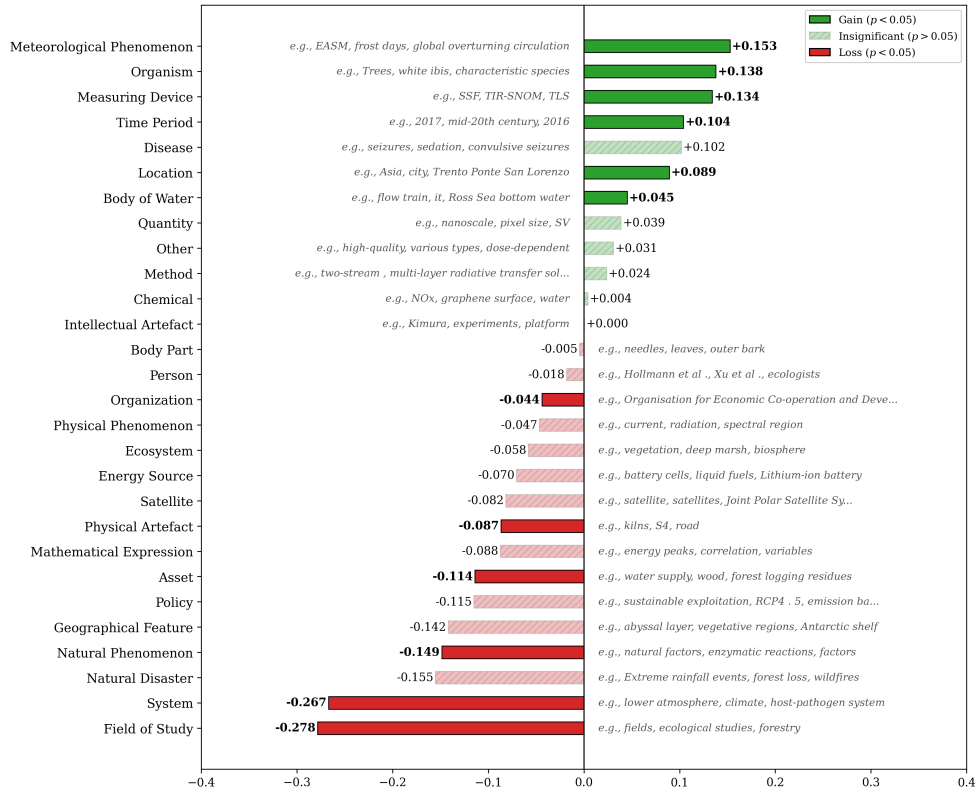

**Fig. G4: Group 1a domain adaptation gains:** Pairwise comparison of INDUS with the RoBERTa baseline. Bar magnitudes represent the change in *strict* F1 score for each entity type. Solid bars indicate statistically significant differences ( $p < 0.05$ ), while hatched bars indicate non-significant differences. Annotations show representative entity examples selected by weighted sampling.

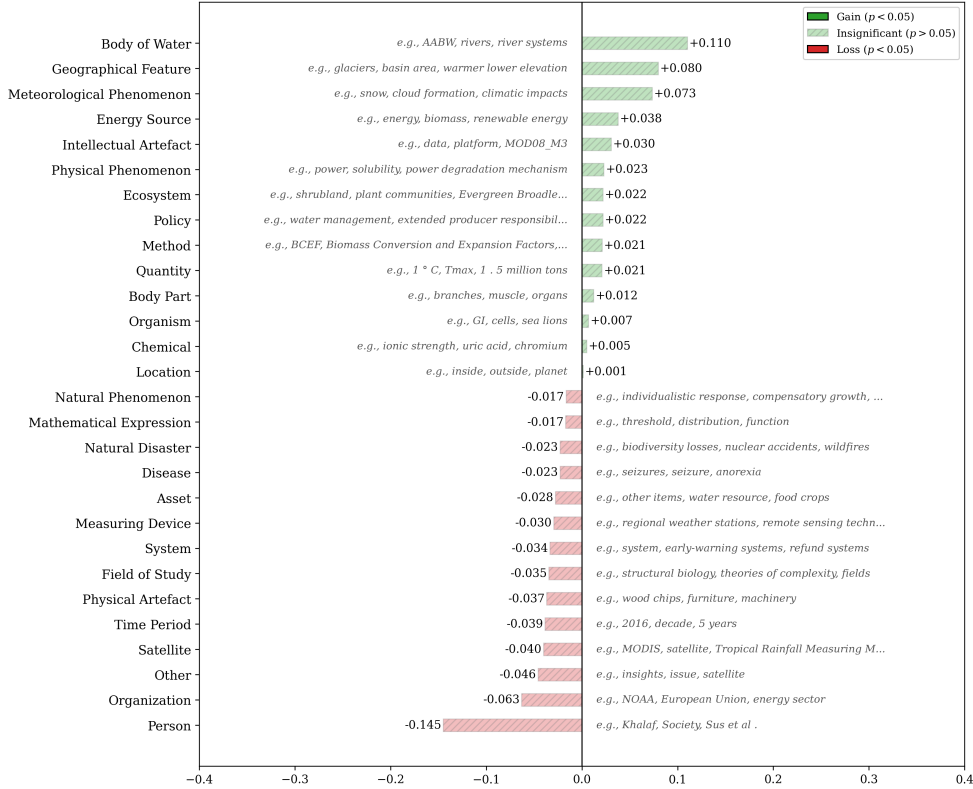

**Fig. G5: Group 1b domain adaptation gains:** Pairwise comparison of CliSciBERT with the SciBERT baseline. Bar magnitudes represent the change in *strict* F1 score for each entity type. Solid bars indicate statistically significant differences ( $p < 0.05$ ), while hatched bars indicate non-significant differences. Annotations show representative entity examples selected by weighted sampling.

## 110 Appendix H Limitations

111 During the development of the entity type definitions, we relied in part on commercial  
 112 LLMs such as Gemini 3.0<sub>PRO</sub> and GPT-5.2<sub>PRO</sub> to refine definition consistency and  
 113 detailed annotation rules in the supplementary Annotation Manual. Although the  
 114 annotated data itself was not exposed to these systems, their involvement in shaping the  
 115 taxonomy may have introduced representational alignment with their internal semantic  
 116 structures, potentially conferring an advantage in zero-shot evaluation. However, the  
 117 results in Table ?? provide no consistent evidence of such an effect: while Gemini  
 118 3.0<sub>PRO</sub> and Gemini 2.5<sub>PRO</sub> rank among the stronger models, GPT variants (GPT-  
 119 5.2<sub>PRO</sub> and especially GPT-5.1) perform comparatively poorly. Overall, any potential  
 120 alignment does not appear to lead to systematic performance gains.

121 As stated in Section 3, we use a flat NER schema that prohibits overlapping, nested,  
 122 and discontinuous entities, which inevitably leads to information loss. Discontinuous  
 123 cases are partially addressed through finer-grained annotation rules (Section 5, rule  
 124 “5.0.3 Coordinated Modifiers” in the supplementary CliReNER Annotation Guide-  
 125 line), for example, by splitting coordinated expressions such as *seasonal and annual*  
 126 *mean precipitation* into separate conceptual entities. Nested entities, however, are  
 127 not modelled. To estimate the resulting loss, we re-annotated a 25% sample of the  
 128 CliReNER<sub>gold</sub> dataset (48 sentences) using nested NER principles. The flat annota-  
 129 tion contains 610 entities, whereas the nested version yields 651, indicating a loss of  
 130 approximately 6.3%. In this sample, nested entities account for 7% of all annotations  
 131 (46/651), providing a rough estimate of the information lost under the flat schema.  
 132 This estimate is likely optimistic, as nested structures may be underrepresented in  
 133 the sampled subset. Examples observed in the sample include *Ecosystem* in *wetland*  
 134 *water*, *Body Part* in *structural brain disease*, *Meteorological Phenomenon* in *EASM*  
 135 *index*, and *Chemical* in *PB levels*. We further observe that types such as *Method* and  
 136 *Quantity* frequently participate in nested constructions, which is expected in scientific  
 137 writing. Handling nested NER more systematically is therefore left for future research.

## 138 Appendix I CliReNER<sub>silver</sub> and CliReNER<sub>gold</sub> 139 Additional Statistics

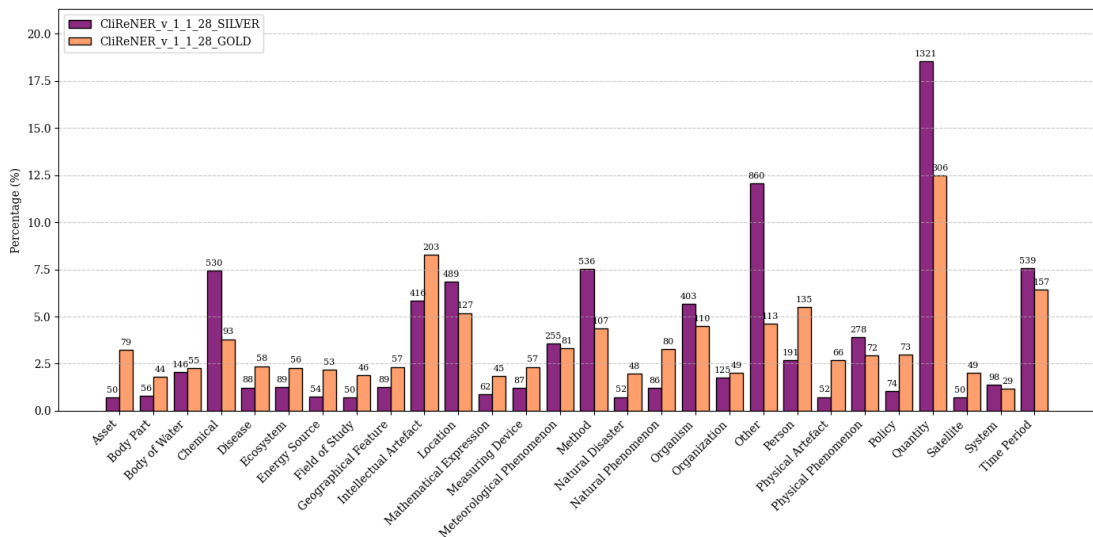

**Fig. I6: Entity type frequency:** Distribution of entity types in the full CliReNER<sub>silver</sub> and CliReNER<sub>gold</sub> datasets. The y-axis shows the percentage of entities per type, while raw entity counts are reported above each bar. Please note that for CliReNER<sub>silver</sub>, only 10% of the dataset is used; therefore, the overall distribution might differ.

| Entity Type               | $\Delta F1$ ( <i>strict</i> ) | $\Delta F1$ ( <i>exact</i> ) | $\Delta F1$ ( <i>type</i> ) | $N_{silver}$ | $N_{silver}$ | $N_{gold}$ | UER <sub>silver</sub> | UER <sub>gold</sub> | UER $\Delta$ | Novelty | Len <sub>silver</sub> | Len <sub>gold</sub> | Len $\Delta$ |
|---------------------------|-------------------------------|------------------------------|-----------------------------|--------------|--------------|------------|-----------------------|---------------------|--------------|---------|-----------------------|---------------------|--------------|
| Meteorological Phenomenon | 0.2583                        | 0.0896                       | 0.2805                      | 255          | 28           | 81         | 0.4275                | 0.7284              | -0.3009      | 83.0    | 1.59                  | 1.69                | -0.10        |
| Person                    | 0.2399                        | 0.2171                       | 0.1136                      | 191          | 21           | 135        | 0.6545                | 0.6296              | 0.0248       | 87.1    | 2.10                  | 3.67                | -1.57        |
| Ecosystem                 | 0.2309                        | 0.0936                       | 0.2289                      | 89           | 6            | 56         | 0.4494                | 0.6607              | -0.2113      | 64.9    | 1.48                  | 1.71                | -0.23        |
| Asset                     | 0.2231                        | 0.0635                       | 0.2155                      | 50           | 6            | 79         | 0.7600                | 0.7975              | -0.0375      | 85.7    | 1.84                  | 1.34                | 0.50         |
| Physical Phenomenon       | 0.1683                        | 0.0384                       | 0.1548                      | 278          | 38           | 72         | 0.6655                | 0.9444              | -0.2790      | 91.2    | 1.88                  | 1.65                | 0.23         |
| Policy                    | 0.1658                        | 0.0448                       | 0.1914                      | 74           | 10           | 73         | 0.8784                | 0.9726              | -0.0942      | 94.4    | 2.30                  | 2.44                | -0.14        |
| Organization              | 0.1337                        | 0.1876                       | 0.0468                      | 125          | 12           | 49         | 0.8240                | 0.8163              | 0.0077       | 70.0    | 2.57                  | 3.27                | -0.70        |
| Intellectual Artefact     | 0.0868                        | -0.0553                      | 0.0791                      | 416          | 48           | 203        | 0.6082                | 0.6502              | -0.0421      | 75.0    | 1.92                  | 1.67                | 0.25         |
| Method                    | 0.0849                        | 0.1100                       | 0.0558                      | 536          | 46           | 107        | 0.7388                | 0.9065              | -0.1677      | 71.1    | 1.99                  | 1.87                | 0.12         |
| Other                     | 0.0642                        | 0.1356                       | 0.0743                      | 860          | 95           | 113        | 0.8012                | 0.9027              | -0.1015      | 74.5    | 1.69                  | 1.33                | 0.36         |
| Measuring Device          | 0.0536                        | -0.0311                      | 0.1656                      | 87           | 9            | 57         | 0.7586                | 0.8596              | -0.1010      | 71.4    | 2.11                  | 2.02                | 0.09         |
| Disease                   | 0.0514                        | -0.0262                      | 0.0010                      | 88           | 7            | 58         | 0.6364                | 0.6724              | -0.0361      | 69.2    | 1.69                  | 1.64                | 0.05         |
| Chemical                  | 0.0419                        | 0.0166                       | 0.0316                      | 530          | 52           | 93         | 0.4472                | 0.7312              | -0.2840      | 52.9    | 1.41                  | 1.42                | -0.01        |
| Satellite                 | 0.0330                        | -0.0747                      | 0.0738                      | 50           | 7            | 49         | 0.4800                | 0.4286              | 0.0514       | 57.1    | 1.66                  | 1.82                | -0.16        |
| Natural Phenomenon        | 0.0245                        | 0.1509                       | 0.0241                      | 86           | 19           | 80         | 0.9302                | 0.9375              | -0.0073      | 94.7    | 1.94                  | 1.85                | 0.09         |
| System                    | 0.0238                        | -0.0134                      | 0.0331                      | 98           | 11           | 29         | 0.7347                | 0.8276              | -0.0929      | 79.2    | 2.11                  | 1.72                | 0.39         |
| Organism                  | 0.0055                        | -0.0434                      | 0.0606                      | 403          | 60           | 110        | 0.5558                | 0.7182              | -0.1624      | 57.0    | 1.78                  | 1.69                | 0.09         |
| Time Period               | 0.0024                        | -0.0102                      | 0.0394                      | 539          | 68           | 157        | 0.5937                | 0.7006              | -0.1069      | 50.9    | 1.88                  | 1.54                | 0.34         |
| Energy Source             | 0.0022                        | -0.0279                      | 0.0009                      | 54           | 4            | 53         | 0.5926                | 0.6604              | -0.0678      | 68.6    | 2.17                  | 1.66                | 0.51         |
| Physical Artefact         | -0.0122                       | -0.0855                      | -0.0132                     | 52           | 10           | 66         | 0.8462                | 0.9242              | -0.0781      | 90.2    | 1.83                  | 1.55                | 0.28         |
| Mathematical Expression   | -0.0157                       | 0.1623                       | -0.0161                     | 62           | 9            | 45         | 0.9032                | 0.8667              | 0.0366       | 87.2    | 2.15                  | 1.87                | 0.28         |
| Location                  | -0.0252                       | -0.0461                      | 0.0541                      | 489          | 44           | 127        | 0.5010                | 0.7402              | -0.2391      | 59.6    | 1.32                  | 1.65                | -0.33        |
| Body of Water             | -0.0294                       | -0.0116                      | 0.0501                      | 146          | 16           | 55         | 0.4110                | 0.6727              | -0.2618      | 62.2    | 1.51                  | 1.64                | -0.13        |
| Body Part                 | -0.0310                       | 0.1303                       | -0.0632                     | 56           | 5            | 44         | 0.6250                | 0.6364              | -0.0114      | 67.9    | 1.45                  | 1.23                | 0.22         |
| Quantity                  | -0.0496                       | 0.0124                       | -0.0724                     | 1321         | 148          | 306        | 0.6654                | 0.7941              | -0.1287      | 66.7    | 2.13                  | 2.11                | 0.02         |
| Geographical Feature      | -0.0989                       | -0.0498                      | -0.1193                     | 89           | 11           | 57         | 0.8876                | 0.9649              | -0.0773      | 89.1    | 2.19                  | 1.86                | 0.33         |
| Natural Disaster          | -0.1920                       | -0.4146                      | -0.1828                     | 52           | 4            | 48         | 0.6731                | 0.8125              | -0.1394      | 71.8    | 1.94                  | 1.48                | 0.46         |
| Field of Study            | -0.2441                       | -0.2950                      | -0.2485                     | 50           | 6            | 46         | 0.8400                | 0.8696              | -0.0296      | 77.5    | 1.58                  | 1.59                | -0.01        |

**Table 16: Entity-level dataset metrics and F1 evaluation differences:** The difference in across-model average F1 scores ( $\Delta F1$ ) between the *silver* and *gold* evaluation sets is shown alongside key dataset statistics. The first column lists the target entity type, sorted by the *strict* evaluation gap. The following columns provide the evaluation support sizes ( $N$ ), Unique Entity Ratios (UER) measuring lexical diversity, the percentage of novel entities introduced in the *gold* set (Novelty), and the average token span lengths (Len).

140 **Appendix J Zero-Shot Prompt and Entity Instance**  
141 **Examples**

Listing 1: **Zero-shot NER LLM prompt**: LLM prompt used for zero-shot NER model evaluation. Entity type definitions are omitted for brevity.

```
### ROLE
You are an expert Named Entity Recognition (NER) system. Your task is to extract entities from the
user's input text and classify them according to the provided taxonomy.

### TAXONOMY & RULES
Asset - is an object or service of value to humans that can get destroyed or diminished by climate
disasters/hazards. Key categories are health, buildings, infrastructure, and crops or
livestock.
...
Time Period - is a specific point in time, a duration, or a recurring interval. This includes dates,
years, seasons, epochs, and terms describing frequency or temporal extent.

### EXTRACTION PROTOCOL
Follow these steps to generate the output:

1. Analyze Context: Read the entire input sentence to understand the semantic meaning.
2. Identify Candidates: Scan for noun phrases, measurable properties, processes, and specific
objects.
3. Select Head Entities:
- Extract the head entity (the core noun carrying meaning).
- Do not extract nested modifiers as separate entities unless they are distinct.
- Example: In "surface water quality", extract "water quality" (or "quality" depending on
definition), not just "water".
4. Classify: Assign the single best category from the Taxonomy based on the definitions and
heuristics below.
5. Resolve Overlaps:
- Ensure no two extracted entities share the same text spans.
- If an overlap occurs, prefer the longer, more specific span usually, unless the Taxonomy rules
say to prefer the head.
6. Heuristics for Classification:
- Physical Artefact: Tangible manufactured objects.
- Chemical: Substances, materials, or chemical compositions.
- Quantity: Measurable properties, numbers, rates, indices, metrics (including units).
- Policy or Objective: Formal plans, targets, frameworks, or barriers/challenges motivating
action.
- Method: Processes, activities, procedures, or techniques.
- Ecosystem: Biological communities (use Organism for specific species).
- Location: Places, regions, geopolitical entities.
- Intellectual Artefact: Datasets, reports, models, results, theories.
- Person: Authors, specific individuals.
- Natural/Physical Phenomenon: Observable natural processes or physical properties (heat,
radiation).
- Ambiguity Resolution: Use the verb and sentence function. (e.g., "Industry support" -> Method
(the act of supporting); "The Industry" -> Organization or Group).

### OUTPUT CONSTRAINTS
1. Exact Match: The 'entity_text' must match the substring in the input text exactly (
preserve case and punctuation) so that it can be located programmatically.
2. Format: Output strictly valid JSON.
3. Schema:


```

{
  "entity_text": "extracted string",
  "category": "CategoryName",
  "reasoning": "Brief justification based on context/rule."
}

```


4. If no entities are found, return an empty list [].
```

| Entity Type                      | Model 1                                                                                                                                                                                                  | Model 1 & Model 2                                                                                                                                                                                                                                                                                                                                                    | Model 2                                                                                                                                                                                                                                                                                                                                                                                                  |
|----------------------------------|----------------------------------------------------------------------------------------------------------------------------------------------------------------------------------------------------------|----------------------------------------------------------------------------------------------------------------------------------------------------------------------------------------------------------------------------------------------------------------------------------------------------------------------------------------------------------------------|----------------------------------------------------------------------------------------------------------------------------------------------------------------------------------------------------------------------------------------------------------------------------------------------------------------------------------------------------------------------------------------------------------|
| (1) <i>Measuring Device</i>      | <b>RoBERTa</b><br>∅                                                                                                                                                                                      | For the purpose, we couple point <b>gauge</b> and satellite rainfall estimates a...<br>...g-to-digital converters (ADCs) and <b>sensors</b> .                                                                                                                                                                                                                        | <b>INDUS</b><br>...time using IASI on MetOp - A/B and <b>CrIS</b> on Suomi - NPP<br>and JPSS are used.<br>...duction in near - real time using<br><b>IASI</b> on MetOp - A/B and CrIS on Suomi - ...                                                                                                                                                                                                     |
| <i>Meteorological Phenomenon</i> | ∅                                                                                                                                                                                                        | ...e, (1) more accurate estimation of <b>rainfall</b> at certain scales is now possible<br>...ce in California and the impact of <b>climate change</b> for drought<br>frequency and snow ret...<br>∅                                                                                                                                                                 | Although <b>rainfall</b> magnitude remains unclear, our dat...<br>...inate in the Tibetan mountains and <b>snow cover</b> in Tibet<br>provides substantial wate...<br>∅                                                                                                                                                                                                                                  |
| <i>Natural Phenomenon</i>        | ...information required to assess the <b>triggering phenomena</b> .<br>...en (N) fixation may play a role in <b>drought tolerance</b> and<br>drought avoidance by <b>supplying</b> ...<br><b>SciBERT</b> | ∅                                                                                                                                                                                                                                                                                                                                                                    | ∅                                                                                                                                                                                                                                                                                                                                                                                                        |
| (2) <i>Body of Water</i>         | ...important water resources for these <b>river systems</b> and reg-<br>ulates seasonal water suppl...<br><b>SciBERT</b>                                                                                 | ∅                                                                                                                                                                                                                                                                                                                                                                    | <b>CliSciBERT</b><br>...wing season as the tree's need for <b>water</b> increases, resulting<br>in a higher v...<br>∅                                                                                                                                                                                                                                                                                    |
| <i>Person</i>                    | ...n 2010b; Wang and Key 2003, 2005b; <b>Warren and<br/>Eastman</b> 2013) that used single or few sate...<br><b>DistilRoBERTa</b>                                                                        | ∅                                                                                                                                                                                                                                                                                                                                                                    | ∅                                                                                                                                                                                                                                                                                                                                                                                                        |
| (3) <i>Disease</i>               | ∅                                                                                                                                                                                                        | .../mL, and adverse clinical signs of <b>sedation</b> and ataxia were noted at PB<br>levels...<br>The animal was diagnosed with <b>epilepsy</b> caused by suspected<br>DA toxicois b...<br>... energy sources such as the use of <b>biomass</b> [68]. The potential of<br>dedicated <b>energy crops</b> as suitable feedstock for produc...<br><b>SciClimateBERT</b> | ... ug/mL. Anorexia, weight loss, and <b>behavioral changes</b><br>appeared to be associated with thi...<br>... sedation, ataxia,<br>weight loss and <b>behavioral changes</b> [37].<br>... of many energy storage solutions, <b>lithium-ion batteries</b><br>(LIBs) are attracting more and mor...<br>...argets for<br>increasing the share of <b>RES</b> in the energy mix represents a<br>ma]...<br>∅ |
| <i>Energy Source</i>             | ∅                                                                                                                                                                                                        | ... the lidar acquires profiles of <b>aerosol humidification</b> every 10 min com-<br>pared to the 1 - ...<br>...aterials procedures (ASTM) for the <b>pyrolysis</b> of<br>liquid fuels.<br>∅                                                                                                                                                                        | ... influencing cloud formation and <b>indirect radiative<br/>forcing</b> .<br>∅                                                                                                                                                                                                                                                                                                                         |
| <i>Physical Phenomenon</i>       | ...relationship between temperature and <b>evapotranspiration</b><br>(Anderson, 1936), and increasing V...<br><b>DistilRoBERTa</b>                                                                       | ∅                                                                                                                                                                                                                                                                                                                                                                    | <b>ClimateBERT</b><br>∅                                                                                                                                                                                                                                                                                                                                                                                  |
| (4) <i>Body Part</i>             | ∅                                                                                                                                                                                                        | ...year-old branches and needles and <b>wood</b> and outer bark, and the entire D.<br>...<br>...vestris—to a greater extent in the <b>branches</b> and needles and to a<br>lesser extent...<br>∅                                                                                                                                                                     | ∅                                                                                                                                                                                                                                                                                                                                                                                                        |
| <i>Organization</i>              | ∅                                                                                                                                                                                                        | ... Institute of Chartered Surveyors ( <b>RICS</b> , whose role it is to provide ' Pro...<br>...onautics and Space Administration ( <b>NASA</b> ) Tropical Rainfall Measuring<br>Missi...<br>∅                                                                                                                                                                       | ∅                                                                                                                                                                                                                                                                                                                                                                                                        |
| <i>Satellite</i>                 | ∅                                                                                                                                                                                                        | ...purpose, we couple point gauge and <b>satellite</b> rainfall estimates at individual<br>g...<br>...t rainfall estimates obtained from <b>satellites</b> [13,14].<br>∅                                                                                                                                                                                             | ... Landsat frequency by downscaling <b>MODIS</b> [19], or the<br>semi-physical fusion ...<br><b>EnvironmentalBERT</b><br>∅                                                                                                                                                                                                                                                                              |
| (5) <i>Ecosystem</i>             | ...and nuclear accidents on different <b>ecosystems</b> .<br>WorldClim was within 1°C outside <b>forest</b> whereas Chelsea was<br>within 1°C insi...<br><b>DistilRoBERTa</b>                            | ∅                                                                                                                                                                                                                                                                                                                                                                    | ∅                                                                                                                                                                                                                                                                                                                                                                                                        |
| <i>Natural Disaster</i>          | ...dty either through forest loss or <b>drought</b> .<br>atmosphere contributing to <b>wildfires</b> (Xu et al., 2020).<br><b>SciBERT</b>                                                                | ∅                                                                                                                                                                                                                                                                                                                                                                    | ∅                                                                                                                                                                                                                                                                                                                                                                                                        |
| <i>Organism</i>                  | ...logy (deciduous or evergreen), and <b>life form</b> (tree, shrub,<br>or herb).<br><b>DistilRoBERTa</b>                                                                                                | ∅                                                                                                                                                                                                                                                                                                                                                                    | ... in cardiac and skeletal muscle in <b>CSL</b> , creatine kinase (CK)<br>was evaluate...<br>∅                                                                                                                                                                                                                                                                                                          |

**Table J7: Model prediction examples:** Correct predictions under the *strict* evaluation strategy are compared between two models. For each model, only predictions that (i) match the CliReNER<sub>gold</sub> annotation and (ii) are consistently produced by at least four out of five model seeds are considered; otherwise, ∅ is reported. Within the text snippets, the target entities are denoted by **bold underline**. The first column lists the target entity type. The second and fourth columns present examples correctly predicted only by Model 1 and only by Model 2, respectively. The third column contains examples successfully identified by both models. The table presents five comparative cases discussed throughout Section 6.2: (1) RoBERTa vs. INDUS, (2) SciBERT vs. CliSciBERT, and (3, 4, 5) DistilRoBERTa vs. SciClimateBERT, ClimateBERT, and EnvironmentalBERT, respectively.

## 142 References

- 143 Anonymous A (2026) Title of the article. Journal Name XX(X):1–15. [https://doi.org/](https://doi.org/xx.xxxx/xxxxxx)  
144 [xx.xxxx/xxxxxx](https://doi.org/xx.xxxx/xxxxxx), anonymized for double-blind review
- 145 Anthropic (2025a) Introducing Claude Opus 4.5. Blog post, URL [https://www.](https://www.anthropic.com/news/claude-opus-4-5)  
146 [anthropic.com/news/claude-opus-4-5](https://www.anthropic.com/news/claude-opus-4-5), accessed: January 8, 2026
- 147 Anthropic (2025b) Introducing Claude Sonnet 4.5. Blog post, URL [https://www.](https://www.anthropic.com/news/claude-sonnet-4-5)  
148 [anthropic.com/news/claude-sonnet-4-5](https://www.anthropic.com/news/claude-sonnet-4-5), accessed: January 8, 2026
- 149 Beltagy I, Lo K, Cohan A (2019) SciBERT: A pretrained language model for scientific  
150 text. In: Inui K, Jiang J, Ng V, et al (eds) Proceedings of the 2019 Conference on  
151 Empirical Methods in Natural Language Processing and the 9th International Joint  
152 Conference on Natural Language Processing (EMNLP-IJCNLP). Association for  
153 Computational Linguistics, Hong Kong, China, pp 3615–3620, [https://doi.org/10.](https://doi.org/10.18653/v1/D19-1371)  
154 [18653/v1/D19-1371](https://doi.org/10.18653/v1/D19-1371), URL <https://aclanthology.org/D19-1371/>
- 155 Bhattacharjee B, Trivedi A, Muraoka M, et al (2024) INDUS: Effective and efficient  
156 language models for scientific applications. In: Dernoncourt F, Preotiuc-Pietro D, Shi-  
157 morina A (eds) Proceedings of the 2024 Conference on Empirical Methods in Natural  
158 Language Processing: Industry Track. Association for Computational Linguistics,  
159 Miami, Florida, US, pp 98–112, <https://doi.org/10.18653/v1/2024.emnlp-industry.9>,  
160 URL <https://aclanthology.org/2024.emnlp-industry.9/>
- 161 Comanici G, Bieber E, Schaekermann M, et al (2025) Gemini 2.5: Pushing the frontier  
162 with advanced reasoning, multimodality, long context, and next generation agentic  
163 capabilities. URL <https://arxiv.org/abs/2507.06261>, arXiv:2507.06261
- 164 DeepSeek-AI, Liu A, Mei A, et al (2025) Deepseek-v3.2: Pushing the frontier of open  
165 large language models. URL <https://arxiv.org/abs/2512.02556>, arXiv:2512.02556
- 166 Devlin J, Chang MW, Lee K, et al (2019) BERT: Pre-training of deep bidirectional  
167 transformers for language understanding. In: Burstein J, Doran C, Solorio T (eds)  
168 Proceedings of the 2019 Conference of the North American Chapter of the Association  
169 for Computational Linguistics: Human Language Technologies, Volume 1 (Long and  
170 Short Papers). Association for Computational Linguistics, Minneapolis, Minnesota,  
171 pp 4171–4186, <https://doi.org/10.18653/v1/N19-1423>, URL [https://aclanthology.](https://aclanthology.org/N19-1423/)  
172 [org/N19-1423/](https://aclanthology.org/N19-1423/)
- 173 Google (2025) Gemini 3. Blog post, URL [https://blog.google/products-and-platforms/](https://blog.google/products-and-platforms/products/gemini/gemini-3/#gemini-3-deep-think)  
174 [products/gemini/gemini-3/#gemini-3-deep-think](https://blog.google/products-and-platforms/products/gemini/gemini-3/#gemini-3-deep-think), accessed: January 8, 2026
- 175 Hovy D, Berg-Kirkpatrick T, Vaswani A, et al (2013) Learning whom to trust with  
176 MACE. In: Vanderwende L, Daumé III H, Kirchhoff K (eds) Proceedings of the 2013  
177 Conference of the North American Chapter of the Association for Computational Lin-  
178 guistics: Human Language Technologies. Association for Computational Linguistics,  
179 Atlanta, Georgia, pp 1120–1130, URL <https://aclanthology.org/N13-1132/>
- 180 Liu Y, Ott M, Goyal N, et al (2019) Roberta: A robustly optimized bert pretraining  
181 approach. URL <https://arxiv.org/abs/1907.11692>, arXiv:1907.11692
- 182 OpenAI (2025a) Introducing GPT-5.1 for developers. Blog post, URL [https://openai.](https://openai.com/index/gpt-5-1-for-developers/)  
183 [com/index/gpt-5-1-for-developers/](https://openai.com/index/gpt-5-1-for-developers/), accessed: January 8, 2026
- 184 OpenAI (2025b) Introducing GPT-5.2. Blog post, URL [https://openai.com/index/](https://openai.com/index/introducing-gpt-5-2/)  
185 [introducing-gpt-5-2/](https://openai.com/index/introducing-gpt-5-2/), accessed: January 8, 2026

- 186 Poleksić A, Martinčić-Ipšić S (2025) Pretraining and evaluation of bert models for  
187 climate research. *Discover Applied Sciences* 7(11):1278. [https://doi.org/10.1007/](https://doi.org/10.1007/s42452-025-07740-5)  
188 [s42452-025-07740-5](https://doi.org/10.1007/s42452-025-07740-5), URL <https://doi.org/10.1007/s42452-025-07740-5>
- 189 Sanh V, Debut L, Chaumond J, et al (2020) Distilbert, a distilled version of bert: smaller,  
190 faster, cheaper and lighter. URL <https://arxiv.org/abs/1910.01108>, arXiv:1910.01108
- 191 Schimanski T, Reding A, Reding N, et al (2024) Bridging the gap in esg measurement:  
192 Using nlp to quantify environmental, social, and governance communication. *Finance*  
193 *Research Letters* 61:104979. [https://doi.org/https://doi.org/10.1016/j.frl.2024.](https://doi.org/https://doi.org/10.1016/j.frl.2024.104979)  
194 [104979](https://doi.org/https://doi.org/10.1016/j.frl.2024.104979), URL <https://www.sciencedirect.com/science/article/pii/S1544612324000096>
- 195 Webersinke N, Kraus M, Bingler J, et al (2022) ClimateBERT: A Pretrained Language  
196 Model for Climate-Related Text. In: *Proceedings of AAAI 2022 Fall Symposium: The Role of AI in Responding to Climate Challenges*, [https://doi.org/https://doi.](https://doi.org/https://doi.org/10.48550/arXiv.2212.13631)  
197 [org/10.48550/arXiv.2212.13631](https://doi.org/https://doi.org/10.48550/arXiv.2212.13631)
- 199 Zaratiana U, Tomeh N, Holat P, et al (2024) GLiNER: Generalist model for named  
200 entity recognition using bidirectional transformer. In: Duh K, Gomez H, Bethard  
201 S (eds) *Proceedings of the 2024 Conference of the North American Chapter of*  
202 *the Association for Computational Linguistics: Human Language Technologies*  
203 *(Volume 1: Long Papers)*. Association for Computational Linguistics, Mexico City,  
204 Mexico, pp 5364–5376, <https://doi.org/10.18653/v1/2024.naacl-long.300>, URL [https://](https://aclanthology.org/2024.naacl-long.300/)  
205 [aclanthology.org/2024.naacl-long.300/](https://aclanthology.org/2024.naacl-long.300/)
